# Supplementary material for: Prediction of Refracture After Surgery for Osteoporotic Vertebral Compression Fractures Using the Vertebral B one Quality Index on T1- and T2-Weighted MRI
Source: Research Square preprint supplement (doi:10.21203/rs.3.rs-7804344/v1), 2025-10-29
Supplement: Supplementary file 1 [file 0c24a511594b5295fcb60833.xlsx]

## Sheet: Sheet 1
id	gender	age	PMH	HTN	DM	BCV	BCL	LSBMD	refrecture	BMI	FNBMD	T2_median	T1_median	T2VBQ	T1VBQ	CThu	refrecture_factor
91300	Female	86	0	0	0	4	0	-4.7	Yes	17.5	-5.2	1924.4	1023	1.0114	3.79874	50	Yes
296235	Female	78	0	1	0	8	1	-4.4	Yes	29.8	-3.7	1808.85	1006	0.92676	3.84704	23.85	Yes
272177	Female	82	0	1	0	3.5	0	-5.2	Yes	18.7	-4.1	188.75	238.2	0.525181	4.08576	56.8	Yes
94898	Female	80	0	0	0	7.5	0	-4.8	Yes	22.4	-5.3	155.8	180.3	0.525996	3.84435	43.3	Yes
220471	Female	74	0	0	0	6	1	-5.2	Yes	16	-3.6	184.25	208.1	0.466456	3.4227	40.35	Yes
234553	Female	84	0	0	0	4	0	-4.2	Yes	21	-2.7	174.5	240.3	0.861303	3.23419	36.3	Yes
157209	Female	80	0	1	1	6	0	-4.1	Yes	27.4	-4.1	151.5	184	0.441434	3.91489	66.7	Yes
223924	Female	85	0	0	0	6	0	-5.6	Yes	18.3	-4.7	123.85	206.35	0.348972	3.81423	20	Yes
233834	Female	79	0	1	0	3.6	0	-3.1	Yes	24.4	-3.1	157.9	188.4	0.638754	3.42545	40.3	Yes
194916	Female	90	0	1	0	5	1	-2.5	Yes	20.4	-4	101.9	141.6	0.458596	2.93168	80	Yes
237584	Female	72	0	0	0	4	0	-5.4	Yes	21.4	-3.2	212.2	297.1	0.600623	4.38201	38.9	Yes
175133	Female	78	0	0	0	3	0	-4.9	Yes	20.3	-3.6	168	206.5	0.522388	4.15493	48.9	Yes
273782	Female	76	0	0	0	1	0	-3.4	Yes	22.5	-2.5	165	203.1	0.466365	3.76111	107.8	Yes
294384	Female	88	0	1	0	8	0	-6.3	Yes	18.8	-3.6	147.9	254.3	0.415917	4.32483	18.3	Yes
261126	Female	63	1	0	0	2.5	1	-4.6	Yes	23.2	-2	149.65	187.1	0.621987	4.09409	46.9	Yes
286392	Female	71	0	1	1	5	0	-4.5	Yes	25.4	-1.4	130.5	157.5	0.478723	3.85086	67.9	Yes
280323	Female	78	0	1	0	6	0	-5.2	Yes	19.4	-2.2	148.8	127.7	3.34382	0.539501	33.8	Yes
279311	Male	66	0	0	0	7.2	0	-3.9	Yes	17.9	-2.4	144.3	171.5	0.490816	3.36275	82.9	Yes
261158	Female	84	0	0	0	6	0	-4	Yes	22.3	-2.3	171.1	253.1	0.48608	4.57685	42.9	Yes
169813	Female	71	0	0	0	5	0	-5.3	Yes	20.4	-2.1	185.6	228.6	0.571077	4.38772	35.3	Yes
231182	Male	88	0	1	0	4	0	-3.8	Yes	18.9	-3.8	231.7	191.1	3.9811	0.590544	19.9	Yes
173290	Male	83	0	1	0	5	0	-1.8	Yes	25.6	-2.4	116.1	151.9	0.431438	3.13843	67.2	Yes
242818	Male	63	0	0	0	4.8	1	-3.9	Yes	21.3	-2.4	127.4	177.1	0.43675	3.86681	49.7	Yes
244409	Male	60	0	1	1	4	1	-2.5	Yes	21.5	-2.5	103	144.9	0.322682	2.90964	101.9	Yes
280734	Female	73	0	0	0	4.5	0	-4.5	Yes	18.1	-5	1599.9	677.3	0.957623	3.3381	51.7	Yes
170095	Female	73	0	0	0	3.6	0	-5.1	Yes	24.7	-3.9	1572.9	613.1	0.82502	3.61498	59.5	Yes
234183	Female	86	0	1	0	5	1	-2.6	Yes	26.2	-2.4	111.8	149.8	0.43912	3.24242	33.4	Yes
141935	Female	88	0	0	0	5	0	-3.6	Yes	19.6	-4.6	1829.7	730.5	1.04788	4.03814	88.45	Yes
131489	Female	83	0	1	1	4	0	-3.2	Yes	21.3	-3.2	138.3	193.6	0.460846	3.91903	36	Yes
235366	Female	91	1	0	0	3	0	-2.8	No	17.6	-4.1	128.6	139.7	0.44026	3.03696	43.4	No
204908	Female	63	0	0	0	4	0	-4	No	21.8	-2	168.4	201.65	0.471709	3.67974	116.1	No
290330	Male	75	0	0	0	4.7	0	-3.4	No	19.1	-2.3	184.6	237.2	0.543741	3.38374	82.2	No
184958	Male	69	0	1	0	6	1	-3.1	No	25.5	-2.9	115.85	150	0.49721	3.21888	91.8	No
273139	Female	58	0	0	0	3	1	-4.1	No	21.4	-3.6	150.6	195.9	0.48801	3.40696	76.7	No
288686	Female	87	0	0	0	5	1	-4	No	15.1	-4.4	175.7	218.2	0.453185	3.4912	73.5	No
124539	Female	80	1	0	0	3.6	1	-3.8	No	21.3	-2.4	147.5	173.1	0.716715	3.69083	41.3	No
287917	Female	62	0	1	0	5	0	-1.2	No	22.5	-1.5	137.5	178.8	0.446574	2.94563	80.4	No
286378	Female	67	0	1	0	3.5	1	-3.3	No	19.5	-3	151.1	167.6	0.394105	2.32455	135.45	No
287792	Female	65	0	0	0	5	0	-3.6	No	24.1	-1.8	136.1	171.8	0.46514	3.34241	107.7	No
287108	Female	70	0	1	0	4.8	0	-3.3	No	25	-1.9	139.5	179.4	0.557109	3.44338	93.2	No
287048	Female	67	0	1	0	4	0	-3.4	No	25.6	-3.4	117.55	189.35	0.43106	3.69824	77.8	No
285344	Male	72	0	1	0	4	0	-3.3	No	17	-3.3	160.35	212.8	0.396808	3.45455	67.5	No
285111	Male	70	1	0	0	3.6	0	-3.4	No	21.6	-2.9	119.1	157.3	0.347839	2.56607	66.6	No
140385	Female	78	0	1	0	3	0	-3.5	No	18.7	-2.5	145.8	189.35	0.550189	3.1041	50.05	No
284213	Female	90	0	1	0	4	0	0.9	No	18.1	-1.8	156.5	187.1	0.520106	2.72344	94.9	No
67517	Female	82	0	1	0	4.5	1	-4.5	No	21.9	-4.5	191.6	236	0.47984	3.71069	40.3	No
283305	Male	80	0	1	0	6	0	-3.8	No	24	-3.1	125.55	177.5	0.842052	2.46871	85.7	No
283231	Female	77	0	1	0	6	0	-3.4	No	20.6	-3.5	179.8	221.1	0.491123	3.94821	58.55	No
182674	Female	81	0	1	1	5	0	-3.6	No	26.2	-2.8	156.8	189.95	0.534606	3.77634	73.8	No
282848	Female	80	0	1	0	5.3	1	-3.5	No	24.4	-2.9	172.6	183.3	0.635493	3.55233	111.4	No
282699	Female	63	0	1	0	5	0	-2.9	No	22.2	-1.8	109.2	143.5	0.539526	3.30645	84.7	No
261006	Male	78	0	1	0	4.5	0	-2.9	No	21.9	-2	136.35	178.2	0.408234	3.57831	56.9	No
282644	Female	54	0	0	0	2	0	-2.1	No	23.4	-1.1	110.9	149.7	0.358668	3.09298	119.15	No
149204	Female	82	0	1	0	5	1	-1.9	No	27.3	-3.4	188.2	222.6	0.754309	3.94681	51.2	No
202749	Female	85	1	1	0	3.6	0	-4	No	19.2	-4.2	164	203.5	0.545032	4.13618	57.5	No
275324	Female	74	0	1	0	4	0	-3.5	No	23.6	-3.3	132.8	158.7	0.402668	3.21907	117.5	No
97994	Male	86	0	1	1	6	0	-1.9	No	24.2	-2.5	147.6	181.6	1.11228	2.4607	112.6	No
276750	Male	63	0	1	1	5	1	-2.3	No	21.3	-1.2	113.65	161.05	0.386171	2.8555	133.85	No
276190	Male	82	0	0	0	6	0	-0.7	No	20.2	-2	137.3	156.3	0.489134	3.06471	85.9	No
275666	Female	85	0	0	0	4	0	-3.7	No	17.8	-2.9	123.9	176.6	0.449565	3.4358	91.9	No
273966	Female	89	0	1	0	6	0	-3.7	No	20.5	-4.2	186.2	219.9	0.546201	3.92679	46.25	No
273509	Female	74	0	1	0	6	1	-2.4	No	21.6	-3.1	143.2	187.3	0.364191	2.81231	115.7	No
272753	Female	66	0	0	1	4.2	1	-2	No	29.3	-0.8	128.3	149.6	0.468933	3.29515	92.1	No
189276	Female	50	0	0	0	4	0	-3.2	No	19.9	-2.5	140.8	154.6	0.686494	2.94476	105.3	No
88174	Female	79	0	0	0	4	0	-2.7	No	23	-3.1	137.8	164	0.499637	3.62832	56.65	No
270515	Female	86	0	1	0	5	0	-1.7	No	30.8	-3.3	149.9	178.9	0.691421	3.48054	64.4	No
152117	Female	81	0	1	0	4	0	-3.1	No	23.1	-3.9	158.2	198.3	0.443759	3.5222	142.6	No
226711	Female	75	0	0	0	4	0	-3.4	No	18.2	-2.8	112.1	167	0.423819	3.28094	127.9	No
265879	Female	69	0	0	0	4	0	-3.2	No	21.9	-2.7	177.45	207	0.582185	3.61888	65.2	No
96302	Female	70	0	1	0	7.2	0	-2.5	No	20.9	-2.5	124.9	147.6	0.443852	3.04959	82.1	No
157311	Female	67	0	1	1	5	1	-2.6	No	23.4	-2.6	91.6	132.8	0.310825	3.09557	93.95	No
263907	Female	71	0	1	0	6	0	-3.5	No	24.4	-3.3	134.9	167.8	0.393409	3.17803	62.9	No
262930	Male	76	0	1	0	6	0	-2.7	No	20.2	-2.3	130.4	174	0.382741	2.92929	91.9	No
262740	Female	69	0	1	0	5	0	0.2	No	29	-1.2	128.4	162.1	0.482163	3.29472	130.65	No
261773	Female	64	0	0	0	4.8	0	-2.9	No	20.9	-2.7	153.8	193.6	0.537011	3.6391	82.1	No
261116	Female	60	0	0	0	6	0	-0.1	No	27.1	-1	143.6	166.6	0.51599	2.94867	153.2	No
231914	Female	73	0	0	0	6.5	0	-3.3	No	22.1	-2	115.1	151.8	0.437476	3.13636	103.2	No
256845	Female	62	1	0	0	4	0	-2.6	No	29.3	-1.4	109.3	157.4	0.352922	3.1798	109.1	No
256391	Female	63	0	1	0	3	1	-3.5	No	31.6	-1.2	148.4	160.2	0.588189	3.14118	87.6	No
254777	Female	67	0	0	0	4	1	-3.1	No	22.9	-2.6	134.4	155	0.548348	3.13765	91.95	No
254725	Female	70	0	1	0	3.6	0	-1.6	No	20.3	-2.1	128.7	148.7	0.361517	2.88178	109.5	No
254635	Female	83	0	1	0	6	0	-5.1	No	19.5	-4.3	140.9	187.2	0.413803	3.37906	83.5	No
254601	Female	98	0	0	0	5.5	0	-3.5	No	20	-1.7	114.8	175.15	0.3188	2.78016	111.2	No
254321	Female	84	0	0	0	4	1	-3.2	No	24.4	-2.8	137	186.6	0.48616	3.38043	121.1	No
253874	Female	82	0	1	0	4.8	0	-3	No	20.8	-2.1	148.45	218.3	0.417463	3.53236	80.2	No
253845	Male	75	0	1	0	4.8	1	-3.3	No	22.3	-3.3	145.5	192	0.507853	2.32727	105.8	No
68520	Female	85	0	1	0	6	0	-2.2	No	21.1	-3.9	113.1	143.65	0.418269	3.38797	66.3	No
147127	Female	84	0	0	0	4	0	-3.6	No	20.4	-3.7	149.3	190.85	0.43439	3.61458	67.7	No
253336	Female	69	0	0	0	5	0	-4.9	No	20.4	-3.8	134.3	182.7	0.55703	3.32182	78.1	No
100049	Female	83	0	1	0	3.5	1	-2.9	No	22.4	-2.3	140.3	180.8	0.538786	2.73939	130	No
251252	Male	87	0	1	0	4	1	-3.1	No	23.4	-2.9	153.9	183.4	0.485642	3.19512	113.3	No
143237	Female	76	0	1	1	3	0	-2.9	No	25.7	-3.4	150.25	228.85	0.449178	2.93397	85.8	No
250234	Male	60	0	0	0	3.5	0	-2.9	No	21.8	-3.2	151.1	192.4	0.56613	3.70713	80.9	No
36991	Female	88	0	1	0	4	0	-3.7	No	26.2	-4.2	177.4	236	0.525474	2.70642	64.8	No
249120	Female	73	0	1	1	4	0	-4	No	23.1	-2.4	153.85	193.05	0.455717	3.84562	95.6	No
248904	Female	70	0	1	0	4	0	-3.2	No	25.3	-2.8	136.4	176.4	0.435227	3.19565	77.05	No
248849	Female	81	1	0	0	4	0	-4.5	No	23.1	-4.5	130.1	160.8	0.441316	3.07457	73.6	No
247156	Female	65	1	0	0	5	0	-5.1	No	18.2	-3.1	174.25	207.15	0.941892	4.21894	63.8	No
147339	Female	73	0	0	0	6	0	-2	No	26.3	-3.8	158.6	198.9	0.543896	3.68333	91.8	No
245948	Female	85	0	0	0	7	0	-2.9	No	22.4	-2.4	241.8	209	4.26455	0.517968	104.5	No
114962	Female	86	0	1	0	4.8	0	-3.9	No	17.8	-3.8	168.05	205.15	0.458277	3.63097	40	No
245707	Male	85	0	0	0	4.8	1	-2.8	No	22.3	-2.1	177.9	219.6	0.654044	2.9837	68.1	No
203751	Male	88	0	1	0	5.5	0	-2.9	No	22.4	-1.9	155.6	172.2	0.806218	3.18889	72.9	No
238860	Female	58	0	0	0	7.2	0	-3.9	No	24.7	-3.4	134.4	170.8	0.438499	3.44355	73.4	No
240535	Female	72	0	0	0	5	0	-3.1	No	20.5	-3.6	162.15	189.45	0.480729	3.70744	66.3	No
240519	Female	69	0	0	0	5	1	-3.9	No	20.5	-3.1	179.8	210.7	0.621285	3.98299	88.7	No
237009	Female	73	0	1	0	3.5	0	-3.6	No	26.4	-2.9	167.7	188.2	0.488352	3.94549	38	No
273695	Female	87	0	1	0	2	0	-0.7	No	27.1	-2.8	109.2	138.7	0.513399	2.79074	100.3	No
291741	Female	72	0	0	0	2	1	-1.9	No	23.3	-2.6	156.35	209.65	0.440299	2.96955	136.25	No
283393	Female	82	0	1	1	2	1	-3.7	No	28.9	-2.2	139.2	179.25	0.503436	3.4208	93.2	No
292337	Female	70	0	1	0	3	0	-4.3	No	23.8	-2.4	141.9	173.1	0.442884	3.21747	91.4	No
293008	Female	70	0	0	0	4	0	-3.1	No	24.2	-3.1	146.5	170.9	0.53801	3.59789	117.6	No
234267	Female	60	0	1	0	5	0	-3.5	No	26.1	-2.4	141.8	168.15	0.487453	3.13128	95.8	No
226614	Male	81	0	1	0	5	0	-3.9	No	23.1	-2.6	152	169.9	0.512129	2.93945	43.9	No
223928	Female	73	1	0	0	4	0	-4.6	No	26	-3.2	177.6	238	0.672727	3.42446	71.325	No
253505	Female	72	0	0	1	3.6	1	-3	No	22.6	-1.7	151.25	191.1	0.515508	3.71068	24	No
230831	Male	66	0	0	0	6	0	-1.5	No	24.9	-1.5	107.1	148	0.333853	3.14225	164.6	No
294252	Female	76	0	1	0	5.5	1	-1.7	No	24.4	-2	125.4	157.55	0.49061	3.44748	84.35	No
234794	Female	69	0	0	1	4	0	-4.6	No	24.4	-2.4	129.2	161.7	0.425	2.88235	95.7	No
265312	Female	57	0	0	0	4	1	-5.6	No	20.1	-3.4	129.3	174.7	0.417771	3.32762	77.7	No
185789	Male	70	0	1	0	2.5	0	-3.5	No	22	-2.1	126.6	149.7	0.411707	3.34899	113.3	No
236170	Female	50	0	1	0	4.8	0	-3.1	No	26.4	-2.8	135.7	167.6	0.415366	3.34531	101.4	No
269599	Female	63	0	0	0	4	0	-2.7	No	21.8	-2.4	1685.7	696.6	0.684799	3.58333	86.3	No
157311	Female	67	0	1	1	0	0	-2.6	No	23.4	-2.6	91.5	132.05	0.311861	2.9741	89.2	No
